# Supplementary material for: Fluorescent multi-component polymer sensors for the sensitive and selective detection of Hg2+/Hg+ ions via dual mode fluorescence and colorimetry
Source: Royal Society of Chemistry journal article supplement (doi:10.1039/d1nj04286f), 2021-01-01
Supplement: d1nj04286f1.pdf [file d1nj04286f1.pdf]

**Fluorescent multi-component polymer sensors for sensitive and  
selective detection of Hg<sup>2+</sup>/Hg<sup>+</sup> ions via fluorescence and colorimetry  
dual mode**

Kaiqi Liu<sup>a</sup>, Luminita Marin<sup>b</sup>, Li Xiao<sup>a</sup>, and Xinjian Cheng<sup>a\*</sup>

<sup>a</sup>School of Chemistry and Environmental Engineering, Wuhan Institute of Technology,  
Wuhan, China, 430073

<sup>b</sup>“Petru Poni” Institute of Macromolecular Chemistry of Romanian Academy, Iasi,  
Romania

---

\*Corresponding author: Dr. Cheng, [chxj606@163.com](mailto:chxj606@163.com).

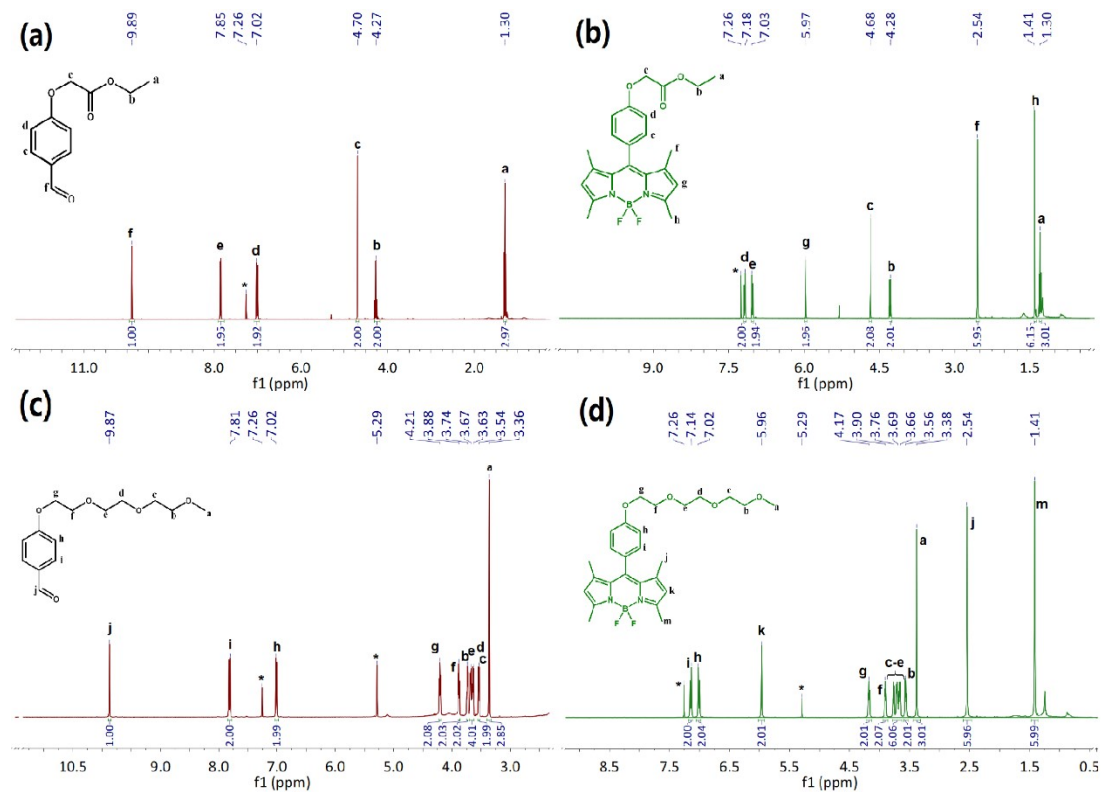

**Figure S1.** <sup>1</sup>H NMR spectra of small molecule compounds (a) O1, (b) BO1, (c) O2, and (d) BO2

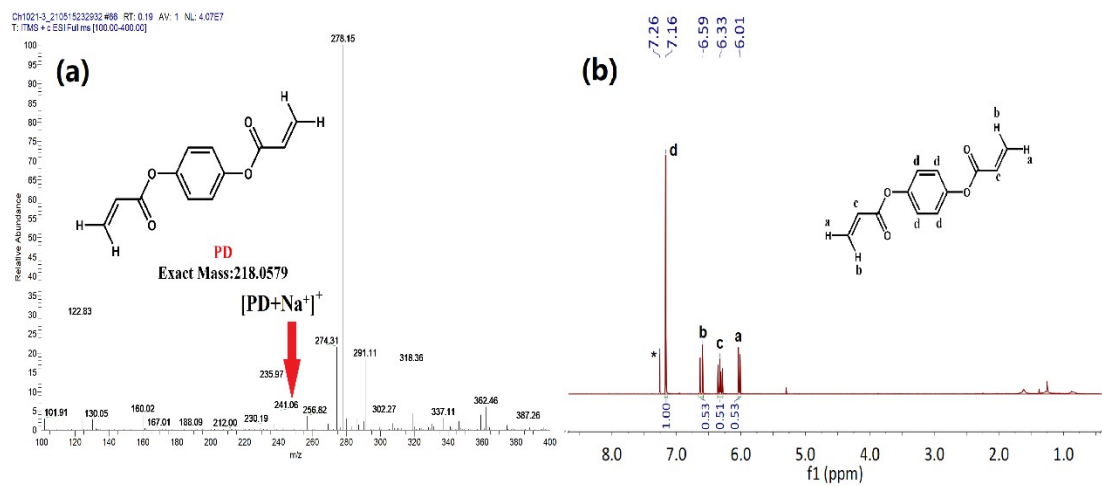

**Figure S2.** (a) <sup>1</sup>H NMR spectra of small molecule compounds PD (b) Mass spectra of PD

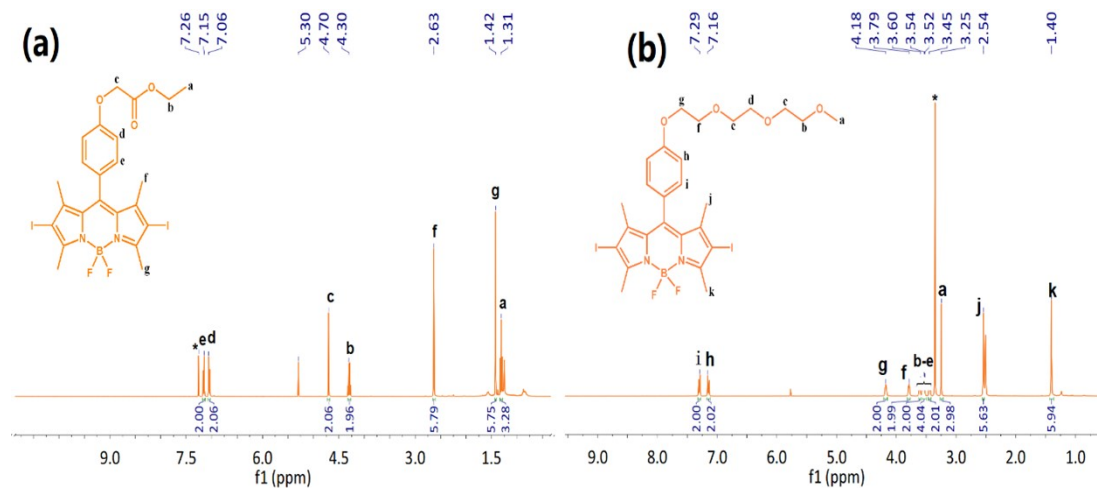

**Figure S3.**  $^1\text{H}$  NMR spectra of small molecule compounds (a) IBO1 and (b) IBO2

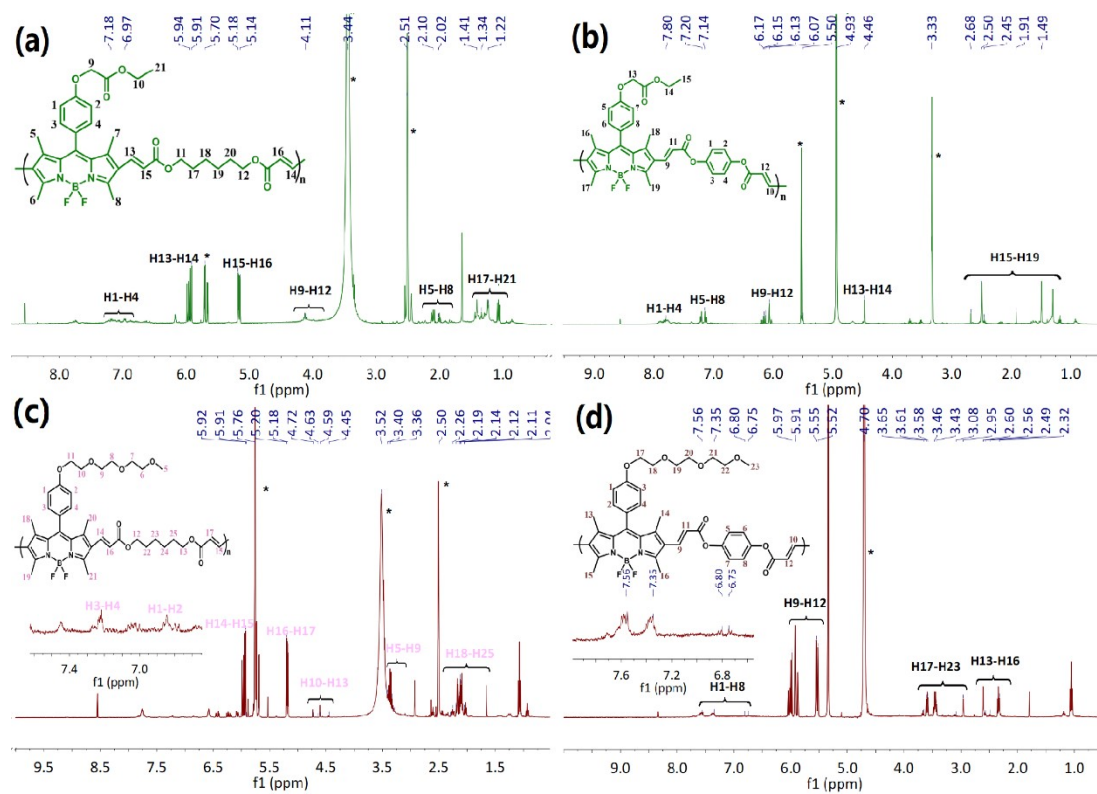

**Figure S4.**  $^1\text{H}$  NMR spectra of polymer probes (a) MCP1, (b) MCP2, (c) MCP3, and (d) MCP4

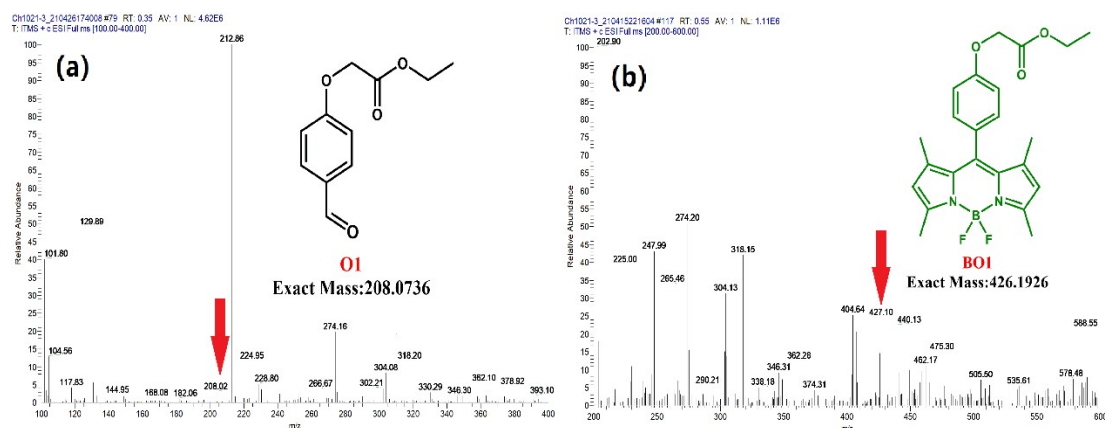

Figure S5. ESI-HRMS spectrum of (a) O1 and (b) BO1

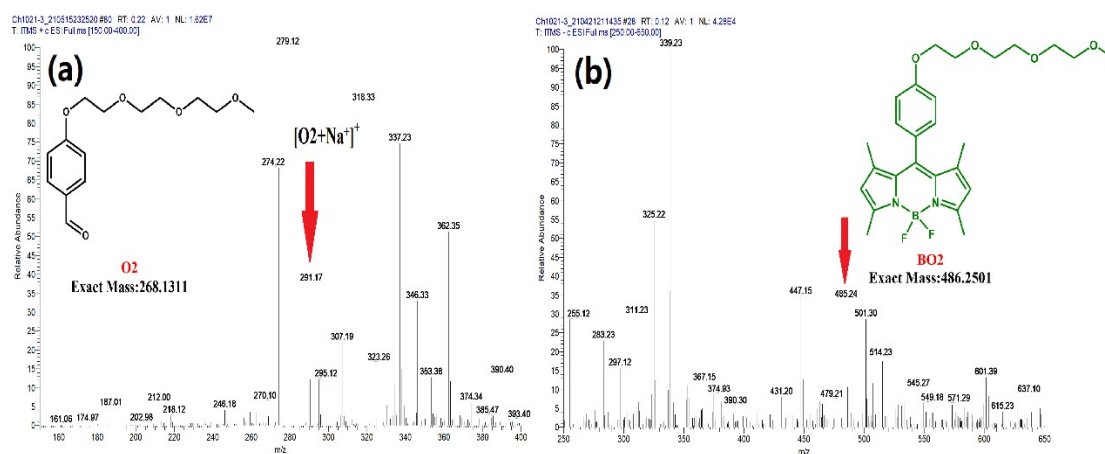

Figure S6. ESI-HRMS spectrum of (a) O2 and (b) BO2

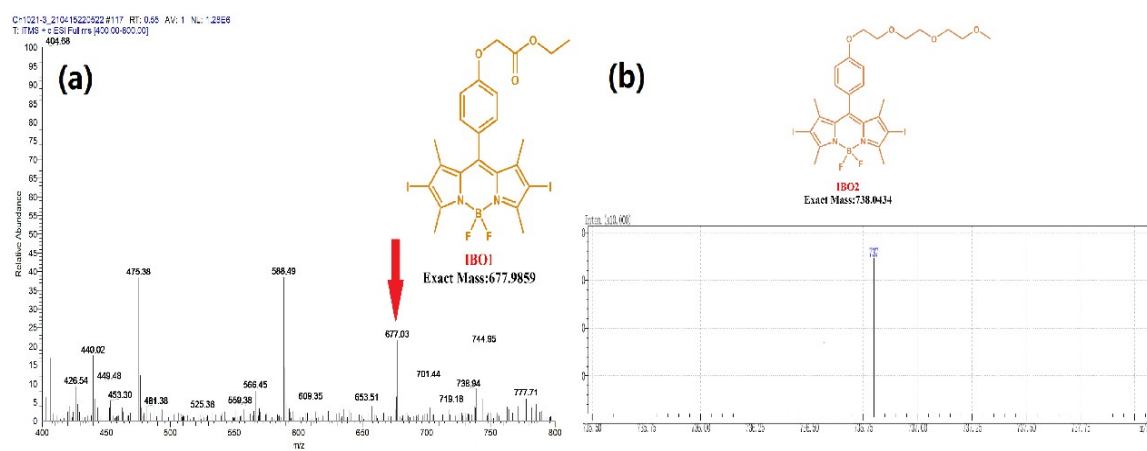

Figure S7. ESI-HRMS spectrum of (a) IBO1 and (b) IBO2

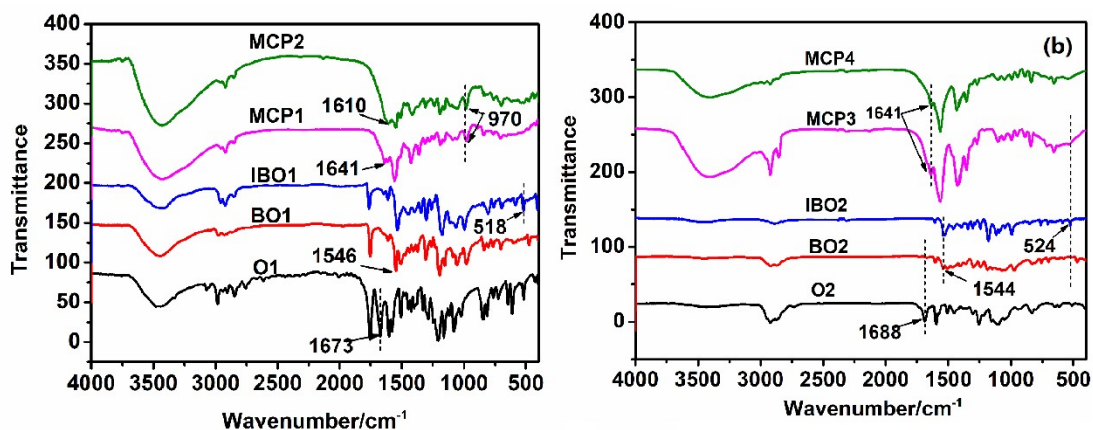

Figure S8. FTIR spectra of (a) O1, BO1, IBO1, MCP1 and MCP2 and (b) O2, BO2, IBO2, MCP3 and MCP4

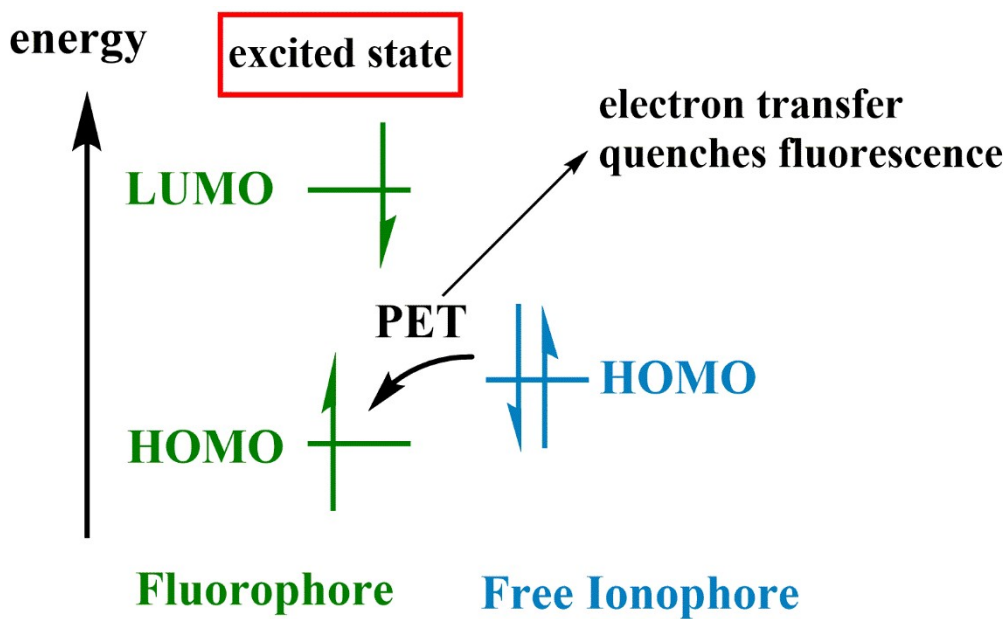

Figure S9. The mechanism of PET

lake water  $\text{Fe}^{3+}$   $\text{Fe}^{2+}$   $\text{Ni}^{2+}$   $\text{Ba}^{2+}$   $\text{Pb}^{2+}$   $\text{Ag}^{+}$   $\text{Zn}^{2+}$   $\text{Hg}^{2+}$   $\text{H}_2\text{O}$   $\text{Hg}^{+}$   $\text{Cu}^{2+}$   $\text{Mg}^{2+}$   $\text{Na}^{+}$   $\text{Cr}^{3+}$   $\text{Cd}^{2+}$   $\text{Al}^{3+}$   $\text{Co}^{2+}$   $\text{Ca}^{2+}$   $\text{Mg}^{2+}$   $\text{K}^{+}$

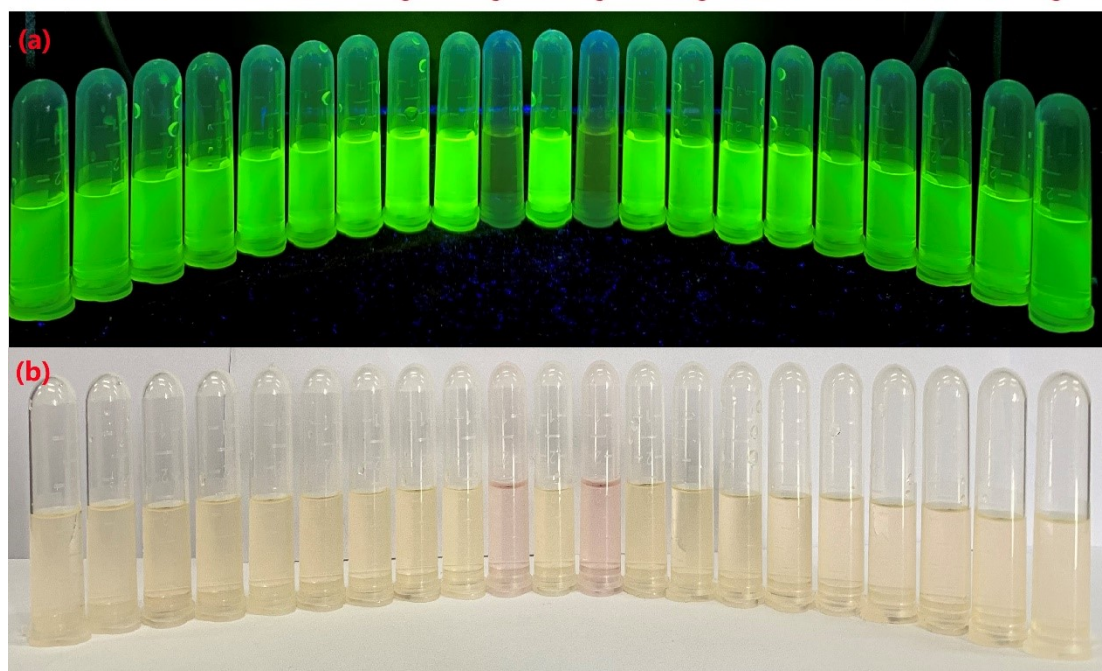

**Figure S10.** (a) photograph of MCP1 with heavy metal ion in EtOH/H<sub>2</sub>O under UV light. (b) photograph of MCP1 with heavy metal ion in EtOH/H<sub>2</sub>O under natural light.

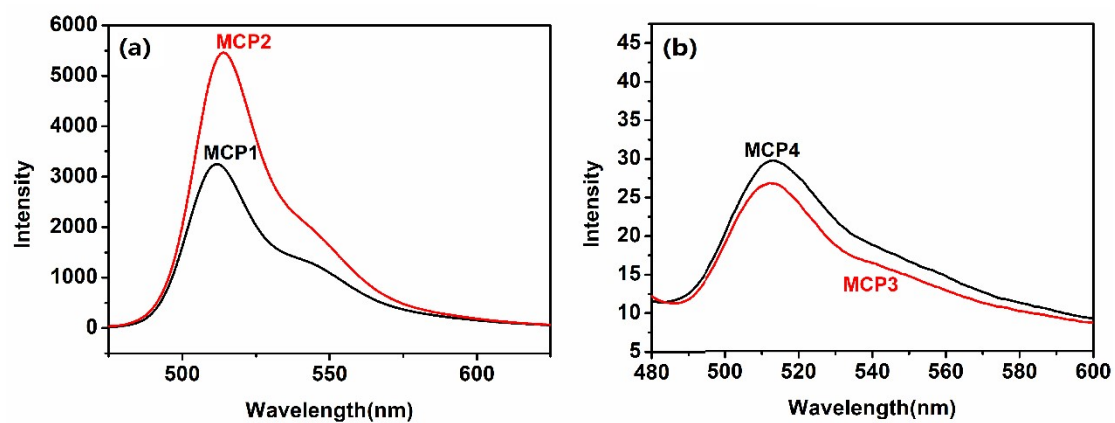

**Figure S11.** Fluorescence emission spectra of macromolecular probes (1  $\mu\text{M}$ ) in EtOH/H<sub>2</sub>O (1:1, rt) (a) MCP1 and MCP2 ( $\lambda_{\text{ex}} = 440 \text{ nm}$ ), (b) MCP3 and MCP4 ( $\lambda_{\text{ex}} = 440 \text{ nm}$ ).



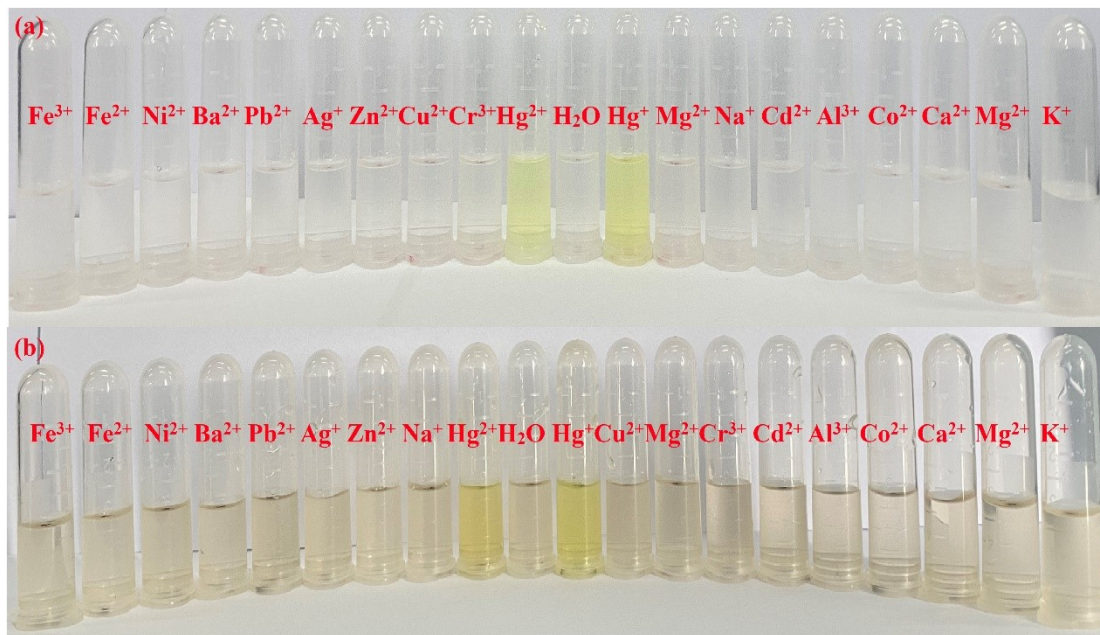

**Figure S12.** (a) photograph of MCP3 with heavy metal ion in water under natural light. (b) photograph of MCP4 with heavy metal ion in water under natural light.

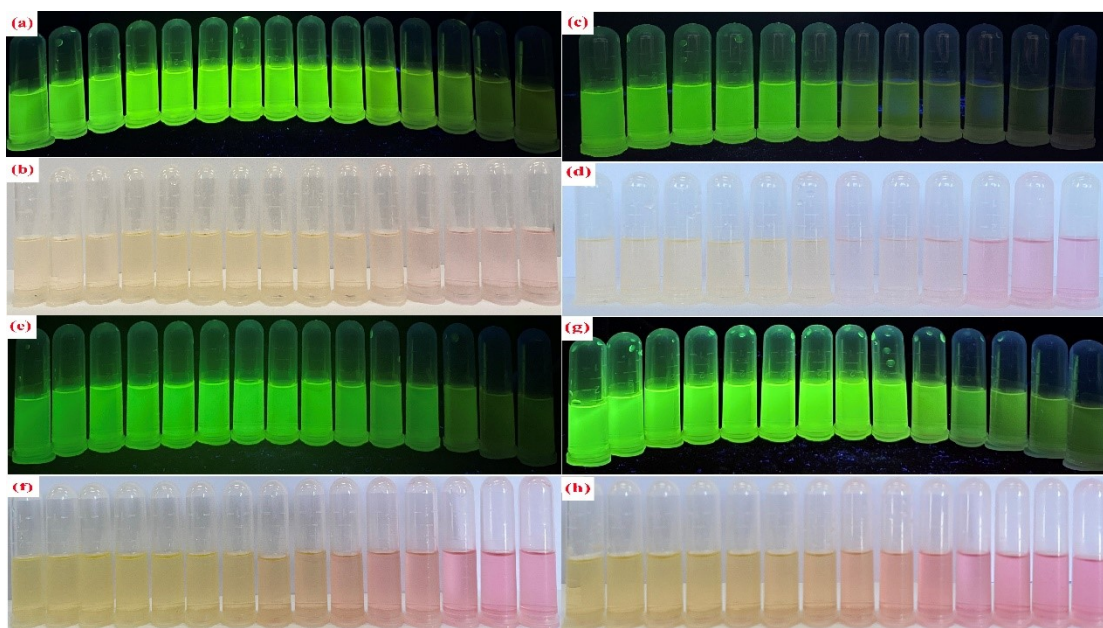

**Figure S13.** (a) photograph of **MCP1** with different concentrations of  $\text{Hg}^+$  in EtOH/ $\text{H}_2\text{O}$  under UV light. (b) photograph of **MCP1** with different concentrations of  $\text{Hg}^+$  in EtOH/ $\text{H}_2\text{O}$  under natural light. (c) photograph of **MCP1** with different concentrations of  $\text{Hg}^{2+}$  in EtOH/ $\text{H}_2\text{O}$  under UV light. (d) photograph of **MCP1** with different concentrations of  $\text{Hg}^{2+}$  in EtOH/ $\text{H}_2\text{O}$  under natural light. (e) photograph of **MCP2** with different concentrations of  $\text{Hg}^+$  in EtOH/ $\text{H}_2\text{O}$  under UV light. (f) photograph of **MCP2** with different concentrations of  $\text{Hg}^+$  in EtOH/ $\text{H}_2\text{O}$  under natural light. (g) photograph of **MCP2** with different concentrations of  $\text{Hg}^{2+}$  in EtOH/ $\text{H}_2\text{O}$  under UV light. (h) photograph of **MCP2** with different concentrations of  $\text{Hg}^{2+}$  in EtOH/ $\text{H}_2\text{O}$  under natural light.



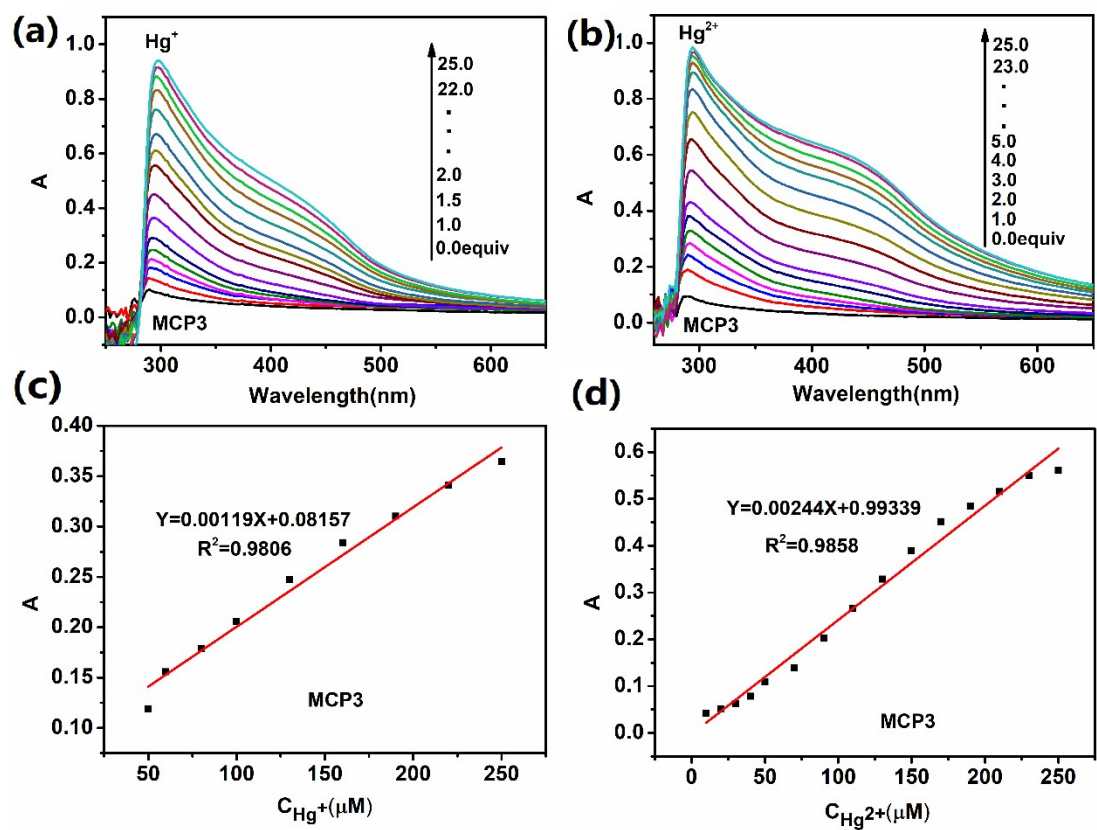

**Figure S14.** (a) Concentration effect of **MCP3** on Hg<sup>+</sup>. (b) Concentration effect of **MCP3** on Hg<sup>2+</sup>.

(c) Concentration-dependent fluorescence signaling of a Hg<sup>+</sup> by **MCP3**, and (d) Hg<sup>2+</sup> by **MCP3**

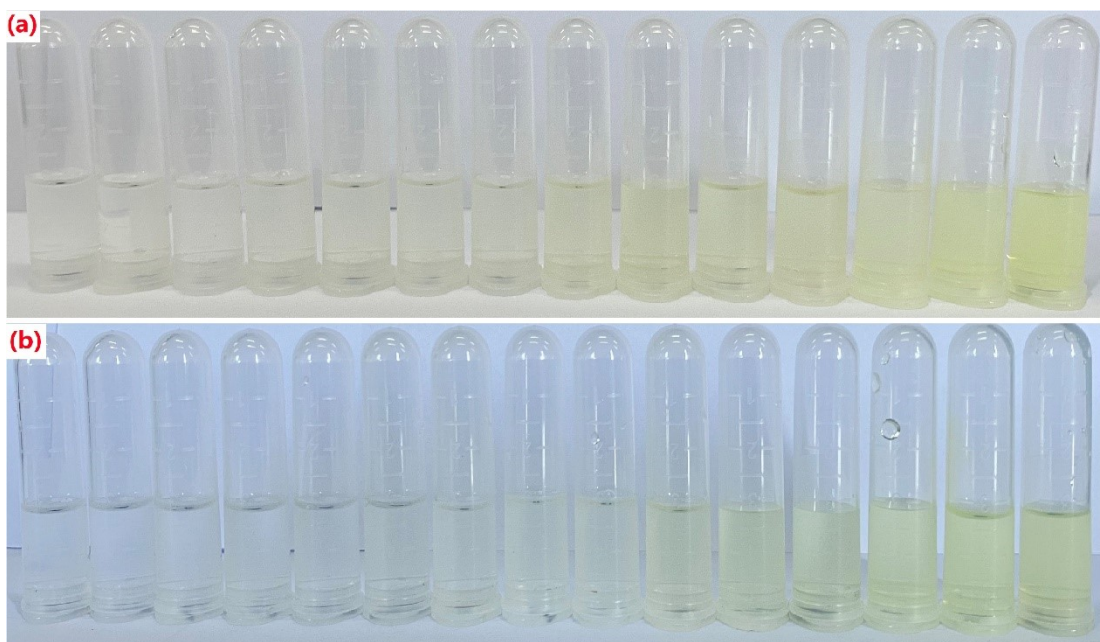

**Figure S15.** (a) photograph of **MCP3** with different concentrations of  $Hg^+$  in water under natural light. (b) photograph of **MCP3** with different concentrations of  $Hg^{2+}$  in water under natural light.

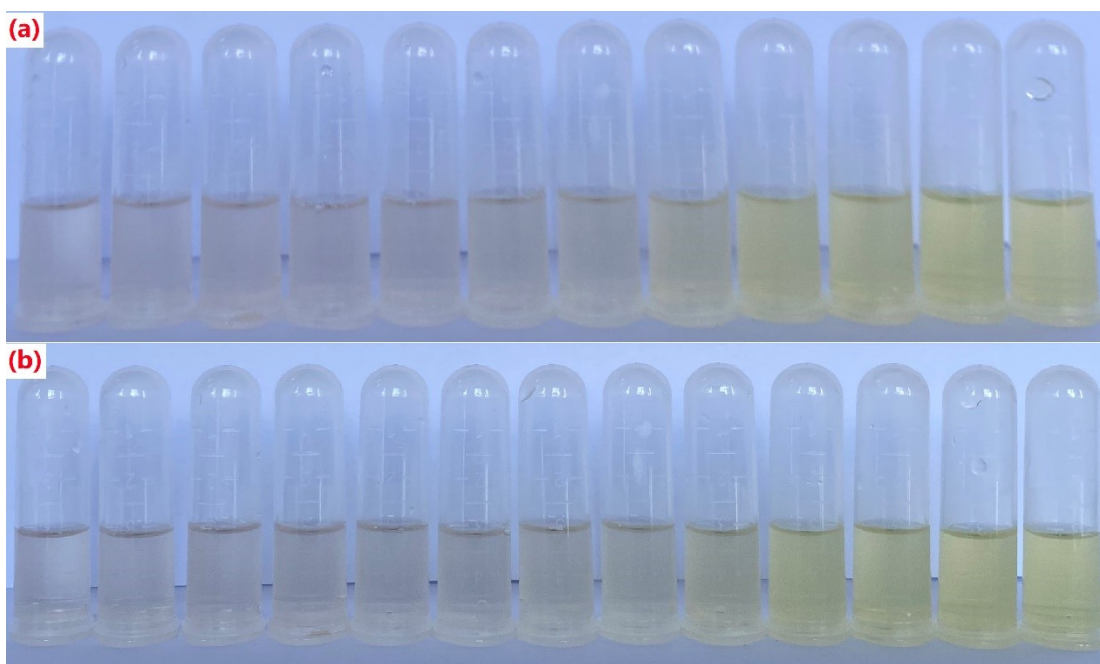

**Figure S16.** (a) photograph of **MCP4** with different concentrations of  $Hg^+$  in water under natural light. (b) photograph of **MCP4** with different concentrations of  $Hg^{2+}$  in water under natural light.

Table S1. Comparison of the basic properties of the reported probe and the probe synthesized in

| <b>Sensor</b> | <b>Selectivity</b>                              | <b>LOD</b>  | <b>Analytical applications</b> | <b>Reference</b> |
|---------------|-------------------------------------------------|-------------|--------------------------------|------------------|
| 1-CN          | Good (Hg <sup>2+</sup> )                        | 0.8μM       | Cell image                     | [1]              |
| 9AnPD         | Effective (Hg <sup>2+</sup> )                   | 5μM         | --                             | [2]              |
| BAN           | Remarkable (Hg <sup>2+</sup> )                  | 0.00173 μM  | Living HeLa cells              | [3]              |
| probe 1       | Sensitive (Hg <sup>2+</sup> )                   | 0.2μM       | Living cells                   | [4]              |
| L             | High (Hg <sup>2+</sup> )                        | 1.1μM       | Living cell imaging            | [5]              |
| PTS           | Sensitive (Hg <sup>2+</sup> )                   | 0.23μM      | --                             | [6]              |
| RFP3          | Excellent (Hg <sup>2+</sup> /Cu <sup>2+</sup> ) | 0.012μM     | HL-7702 cells                  | [7]              |
| P-3           | High (Hg <sup>2+</sup> )                        | 4.8μM       | --                             | [8]              |
| MCP2          | Sensitive (Hg <sup>2+</sup> /Hg <sup>+</sup> )  | 0.32/0.42μM | Lake water                     | This work        |

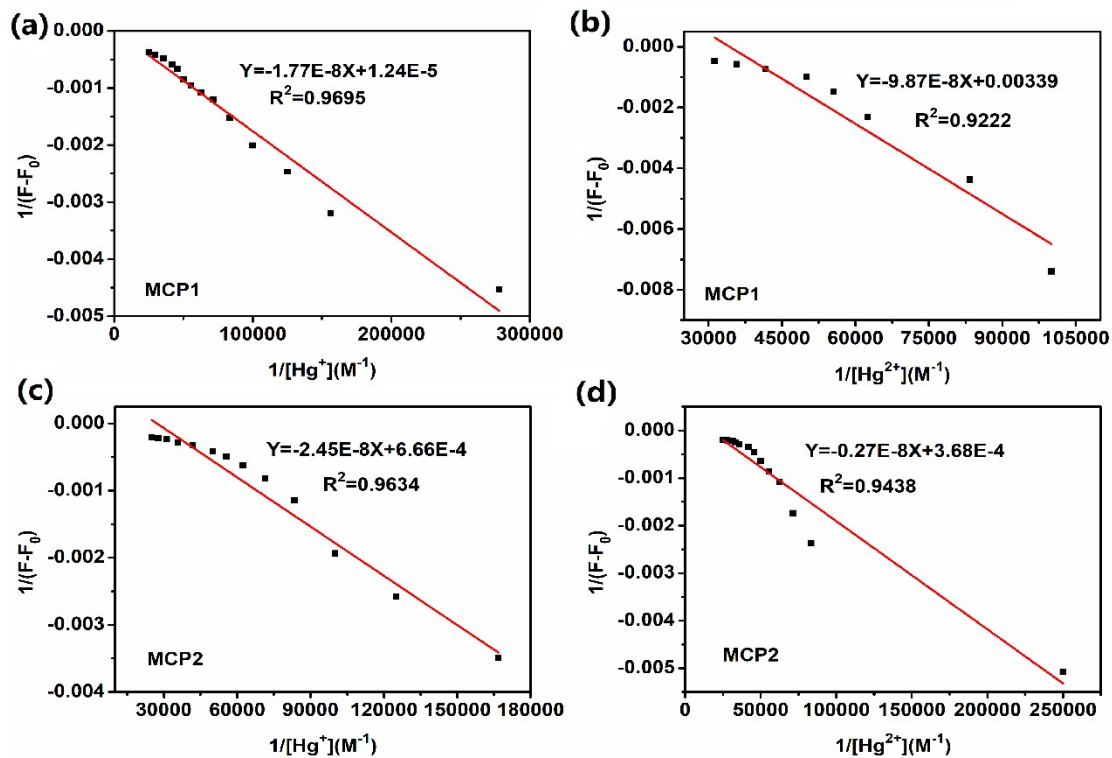

Figure S17. Benesi-Hilderbrand plot of (a) MCP1+ $Hg^+$ , (b) MCP1+ $Hg^{2+}$ , (c) MCP2+ $Hg^+$ , and (d) MCP2+ $Hg^{2+}$

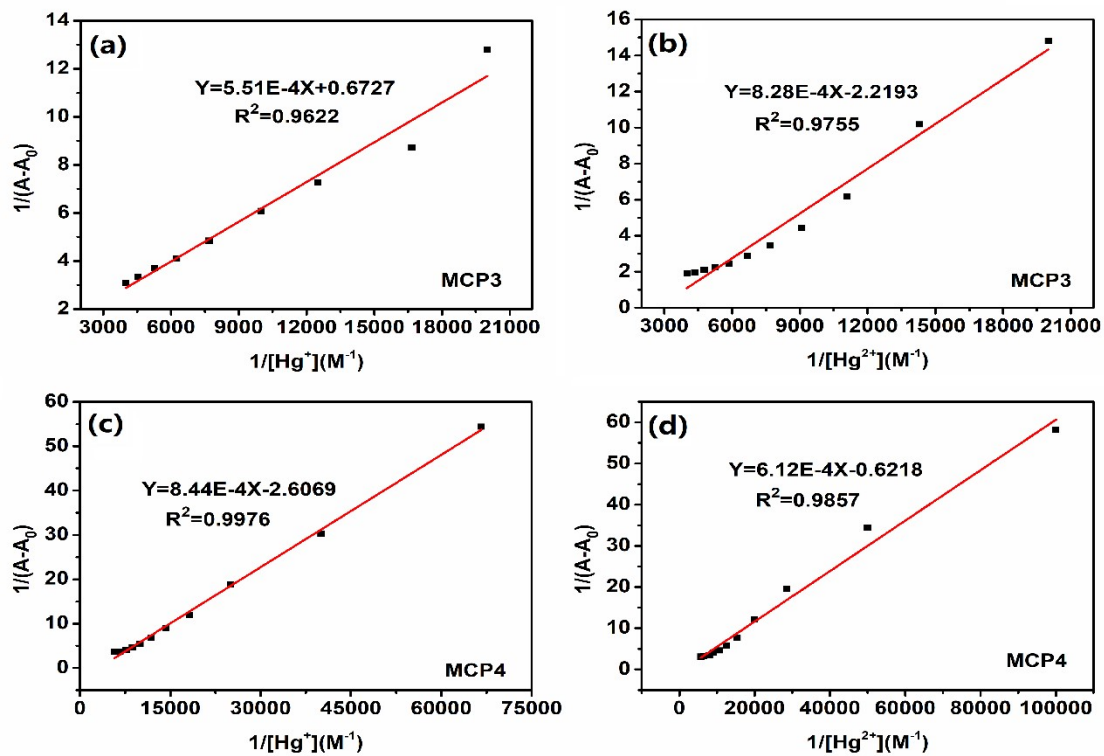

Figure S18. Benesi-Hilderbrand plot of (a) MCP3+ $Hg^+$ , (b) MCP3+ $Hg^{2+}$ , (c) MCP4+ $Hg^+$ , and (d) MCP4+ $Hg^{2+}$

MCP4+Hg<sup>+</sup>, and (d) MCP4+Hg<sup>2+</sup>

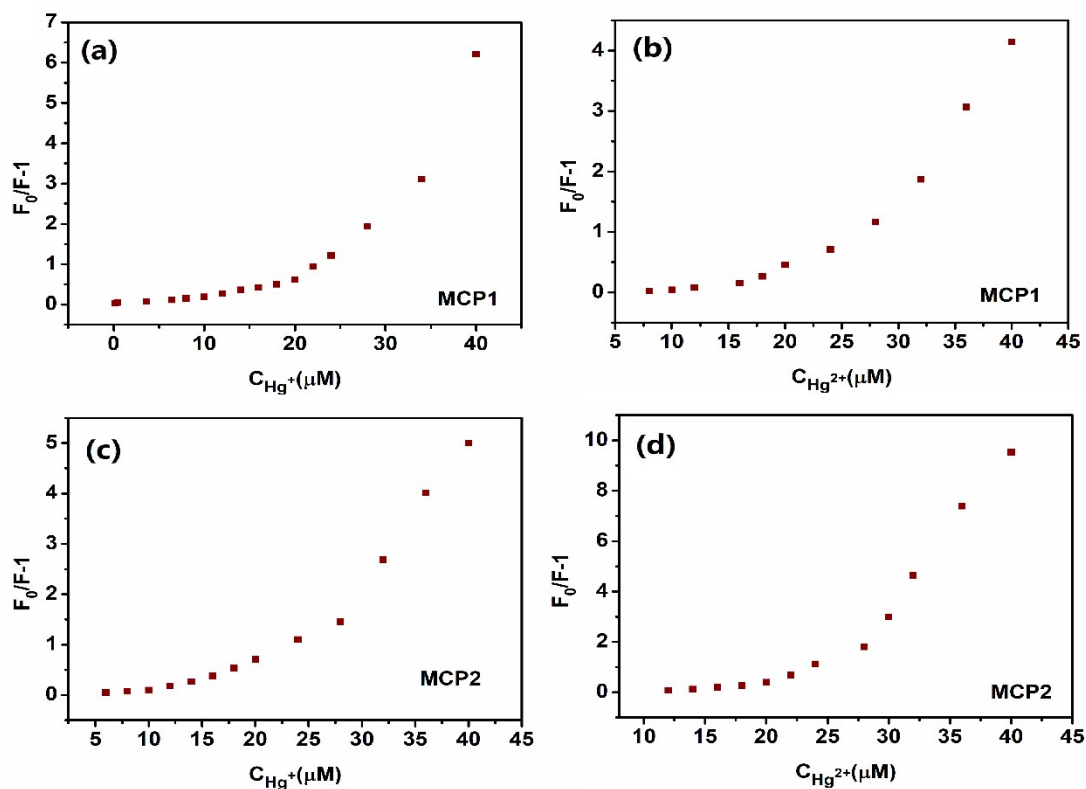

**Figure S19.** The fluorescence intensity of the polymer solution changes with the concentration of Hg<sup>2+</sup>/Hg<sup>+</sup> (a) **MCP1**+Hg<sup>+</sup> (1  $\mu M$ , pH = 7.0, rt); (b) **MCP1**+Hg<sup>2+</sup> (1  $\mu M$ , pH = 7.0, rt); (c) **MCP2**+Hg<sup>+</sup> (1  $\mu M$ , pH = 7.0, rt); (d) **MCP2**+Hg<sup>2+</sup> (1  $\mu M$ , pH = 7.0, rt)



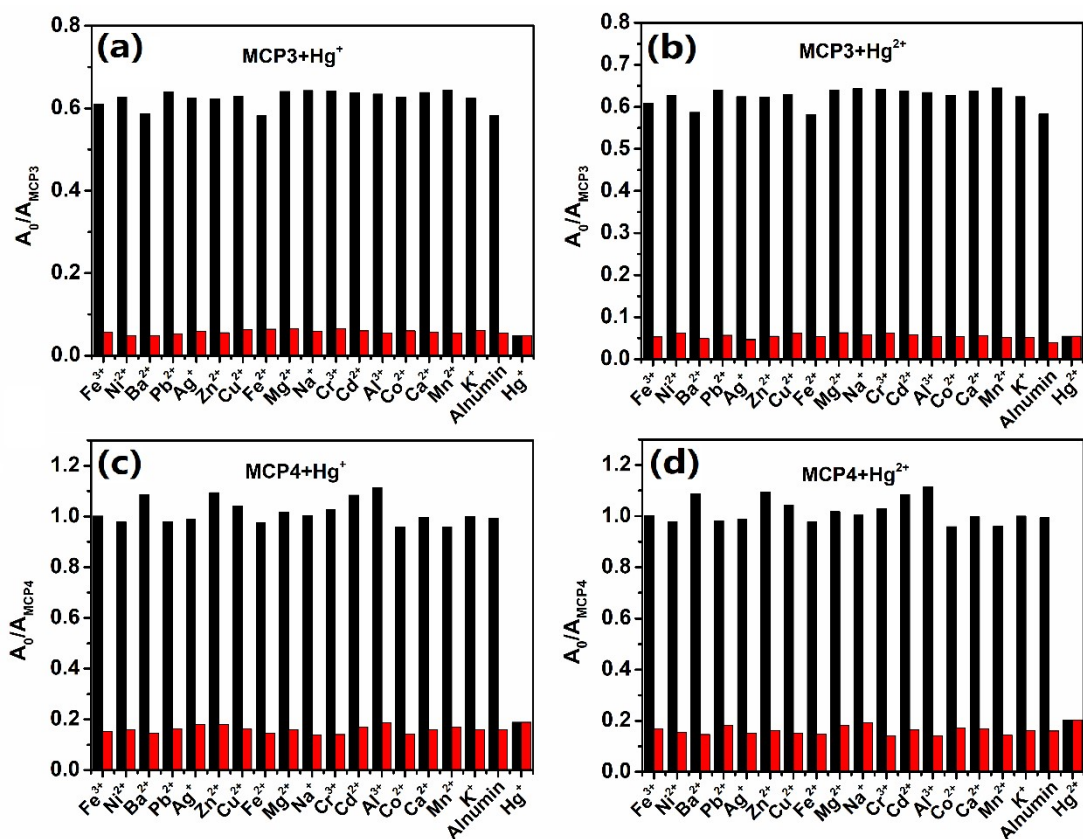

**Figure S20.** Absorbance of probes (10 $\mu$ M) with other metal ions (100  $\mu$ M) and albumin (3.6 mg/mL) in aqueous solution. The black bars represent the addition of different ions to the solution of correspond sensor. The red bars represent the subsequent addition of  $Hg^{2+}/Hg^+$  the solution.

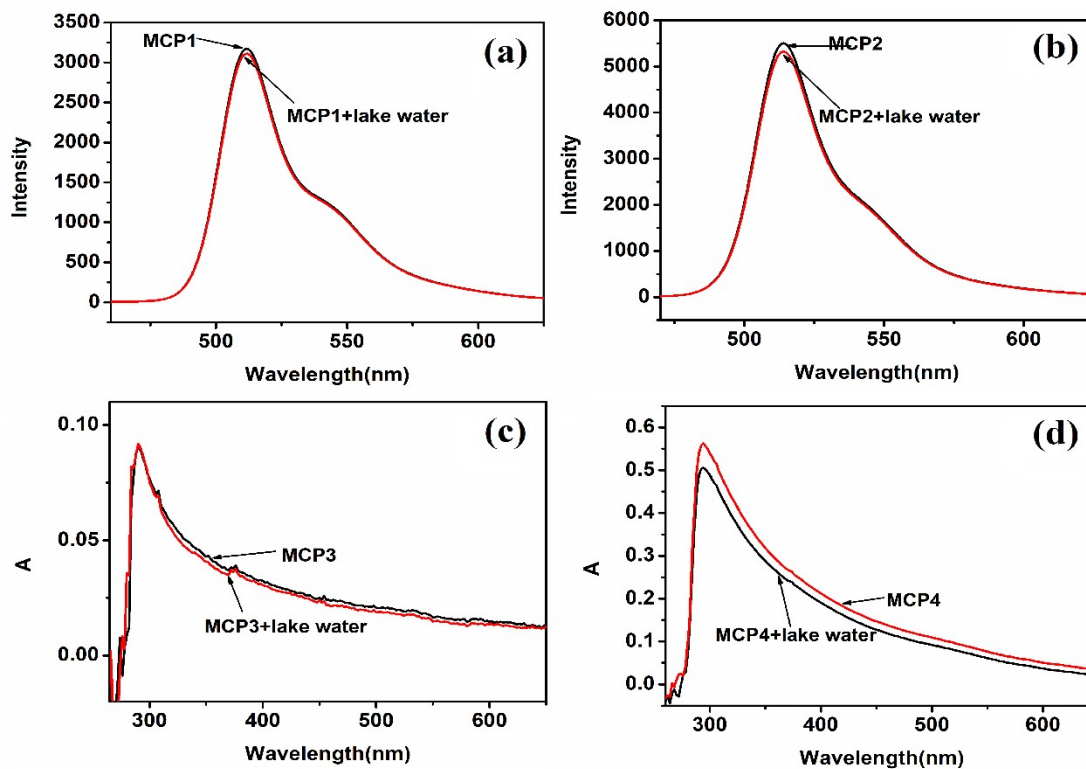

**Figure S21.** The fluorescence emission spectrum of sensor in EtOH/H<sub>2</sub>O and EtOH/natural lake water. (a) MCP1, (b) MCP2. UV absorption spectra of sensor in water and natural lake water. (c)

MCP3, (d) MCP4

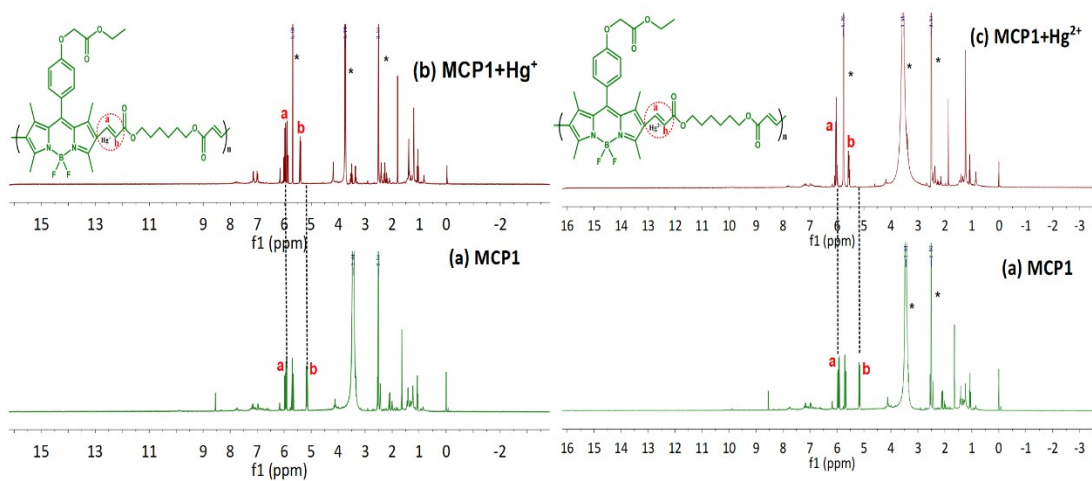

**Figure S22.** (a) <sup>1</sup>H NMR of MCP1 in DMSO-d<sub>6</sub>, (b) <sup>1</sup>H NMR of MCP1 and equimolar amount of Hg<sup>+</sup> in DMSO-d<sub>6</sub>. (c) <sup>1</sup>H NMR of MCP1 and equimolar amount of Hg<sup>2+</sup> in DMSO-d<sub>6</sub>.

## References

- [1] J. Ding, H. Li, C. Wang, J. Yang, Y. Xie, Q. Peng, Q. Li, Z. Li, "Turn-On" Fluorescent Probe for Mercury(II): High Selectivity and Sensitivity and New Design Approach by the Adjustment of the pi-Bridge, *ACS Appl Mater Interfaces* 7(21) (2015) 11369-76. <http://dx.doi.org/10.1021/acsami.5b01800>
- [2] Y. Jia, Y. Pan, H. Wang, R. Chen, H. Wang, X. Cheng, Highly selective and sensitive polymers with fluorescent side groups for the detection of Hg<sup>2+</sup> ion, *Materials Chemistry and Physics* 196 (2017) 262-269. <http://dx.doi.org/10.1016/j.matchemphys.2017.05.001>
- [3] H. Xiao, J. Li, K. Wu, G. Yin, Y. Quan, R. Wang, A turn-on BODIPY-based fluorescent probe for Hg(II) and its biological applications, *Sensors and Actuators B: Chemical* 213 (2015) 343-350. <http://dx.doi.org/10.1016/j.snb.2015.02.105>
- [4] Z. Zhu, H. Ding, Y. Wang, C. Fan, Y. Tu, G. Liu, S. Pu, A ratiometric and colorimetric fluorescent probe for the detection of mercury ion based on rhodamine–benzothiazole conjugated dyad, *Journal of Photochemistry and Photobiology A: Chemistry* 400 (2020). <http://dx.doi.org/10.1016/j.jphotochem.2020.112657>
- [5] W. Feng, Q. Xia, H. Zhou, Y. Ni, L. Wang, S. Jing, L. Li, W. Ji, A fluorescent probe based upon anthracene-dopamine thioether for imaging Hg(2+) ions in living cells, *Talanta* 167 (2017) 681-687. <http://dx.doi.org/10.1016/j.talanta.2017.03.012>
- [6] Y. Shan, W. Yao, Z. Liang, L. Zhu, S. Yang, Z. Ruan, Reaction-based AIEE-active conjugated polymer as fluorescent turn on probe for mercury ions with good sensing performance, *Dyes and Pigments* 156 (2018) 1-7. <http://dx.doi.org/10.1016/j.dyepig.2018.03.060>
- [7] M. Wang, F. Yan, Y. Zou, L. Chen, N. Yang, X. Zhou, Recognition of Cu<sup>2+</sup> and Hg<sup>2+</sup> in physiological conditions by a new rhodamine based dual channel fluorescent probe, *Sensors and Actuators B: Chemical* 192 (2014) 512-521. <http://dx.doi.org/10.1016/j.snb.2013.11.031>
- [8] Y. Lei, F. Ma, Y. Tian, Q. Niu, H. Mi, I. Nurulla, W. Shi, Fluorene-based conjugated polymer with tethered thymines: click postpolymerization synthesis and optical response to mercury(II), *Journal of Applied Polymer Science* 129(4) (2013) 1763-1772. <http://dx.doi.org/10.1002/app.38817>
